# Supplementary material for: Organic fertilizer substitution optimizes aroma metabolites in Wuyi Rock tea
Source: Frontiers journal article supplement (doi:10.3389/fpls.2025.1581120), 2025-06-18
Supplement: Table_1.xlsx [file Table_1.xlsx]

## Sheet: Table S2
NO	volatiles	Retention	RIa	RIb	CAS	Quantify	Confirmation
		time				Ions	Ions
1	Acetone	1.65	486	<800	67-64-1	43.1	58.1, 42
2	Acetic acid	2.099	610	<801	64-19-7	43.1	45.1, 60
3	1-Methoxy-2-propanol	2.534	661	<802	107-98-2	45	47, 43
4	1-Penten-3-ol	2.63	684	<803	616-25-1	57	41, 39
5	Pentanal	2.796	699	<804	110-62-3	44.1	41, 58
6	Acetoin	2.956	713	<805	513-86-0	45.1	43.1, 88
7	3-Penten-2-one	3.49	733	<806	625-33-2	69	41, 84
8	Isobutanoic acid	3.745	777	<807	79-31-2	43.1	41.1, 73
9	Toluene	3.93	763	<808	108-88-3	91	92, 65
10	1-Pentanol	3.952	765	<809	71-41-0	42.1	55, 70
11	cis-2-Penten-1-ol	4.007	767	<810	1576-95-0	57.1	41.1, 43.1
12	Hexanal	4.612	800	800.594	66-25-1	44	41, 56
13	Dihydro-2-methyl-3-furanone	4.76	800	807.802	3188-00-9	43	72, 100
14	Methylpyrazine	5.26	831	830.593	109-08-0	94	67, 39
15	3-Methylbutanoic acid	5.68	863	848.122	503-74-2	60	41, 43
16	(E)-2-Hexenal	5.93	854	857.95	6728-26-3	83	55, 69
17	Ethylbenzene	6.08	855	863.65	100-41-4	91	106, 77
18	4-Methyloctane	6.15	863	866.262	2216-34-4	43	85, 71
19	Butanoic acid, 2-methyl-	6.24	861	869.577	116-53-0	74	41, 57.1
20	m-Xylene	6.33	866	872.844	108-38-3	91	106, 105
21	1-Hexanol	6.35	868	873.564	111-27-3	56	43, 55
22	5-Methyl-3-methylene-5-hexen-2-one	6.71	880	886.147	51756-18-4	81	43, 124
23	o-Xylene	6.91	887	892.849	95-47-6	91	106, 105
24	Butyrolactone	7.4	915	911.053	96-48-0	42	41, 86
25	2,6-Dimethylpyrazine	7.5	917	915.045	108-50-9	108	42, 40
26	Ethylpyrazine	7.57	921	917.808	13925-00-3	107	108, 80
27	2-Ethylhexanal	8.616	956	956.297	123-05-7	57	72, 41
28	cis-Hept-2-enal	8.721	958	959.899	57266-86-1	41.1	39.1, 43.1
29	m-Ethyltoluene	8.79	957	962.242	620-14-4	105	120, 91
30	Benzaldehyde	8.87	962	964.937	100-52-7	106	105, 77
31	1-Octen-3-ol	9.357	980	980.831	3391-86-4	57.1	43.1, 41.1
32	6-Methyl-5-hepten-2-one	9.46	986	984.087	110-93-0	43	41, 55
33	2-Pentylfuran	9.61	993	988.765	3777-69-3	81	82, 138
34	Hexanoic acid	9.66	990	990.309	142-62-1	60	73, 41
35	1,2,4-Trimethylbenzene	9.71	990	991.844	95-63-6	105	120, 77
36	Decane	9.9	1000	997.607	124-18-5	43	57, 71
37	Octanal	9.979	1003	999.97	124-13-0	41.1	43.1, 44.1
38	(E,E)-2,4-Heptadienal	10.27	1012	1012.41	4313-03-5	81	110, 53
39	1,2,3-Trimethylbenzene	10.45	1013	1019.94	526-73-8	105	120, 77
40	2,6-Dimethylnonane	10.49	1018	1021.6	17302-28-2	43	57, 71
41	p-Cymene	10.55	1025	1024.07	99-87-6	119	134, 91
42	2-Ethyl-1-hexanol	10.703	1030	1030.31	104-76-7	57.1	41.1, 43.1
43	3,4-Dimethyl-2,5-furandione	10.74	1038	1031.81	766-39-2	126	39, 82, 54
44	1,1,3-Trimethyl-2-cyclohexanone	10.82	1036	1035.03	766-39-2	82	56, 69, 140
45	Benzyl alcohol	10.86	1036	1036.62	100-5-6	79	108, 77, 107
46	3-Octen-2-one	10.94	1040	1039.81	1669-44-9	55	43, 111, 126
47	Benzeneacetaldehyde	11.07	1045	1044.93	122-78-1	91	92, 120, 65
48	1-Ethyl-1H-pyrrole-2-carbaldehyde	11.17	1046	1048.82	2167-14-8	123	94, 39, 122
49	γ-Caprolactone	11.27	1057	1052.69	695-06-7	85	56, 57, 70
50	2-Methyldecane	11.37	1064	1056.51	6975-98-0	57	43, 71, 85
51	2-Acetylpyrrole	11.63	1064	1066.31	1072-83-9	94	109, 66, 39
52	(E)-2-Octen-1-ol	11.71	1067	1069.28	18409-17-1	57	41, 54, 67
53	cis-Furan linalool oxide	11.79	1074	1072.24	5989-33-3	59	94, 43, 93
54	trans-Furan linalool oxide	12.21	1086	1087.41	34995-77-2	59	94, 111, 43
55	2-Nonanone	12.31	1092	1090.94	821-55-6	58	43, 71, 41
56	3,5-Octadiene-2-one	12.43	1091	1095.15	821-55-6	95	81, 43, 124
57	Linalool	12.56	1099	1099.66	78-70-6	43.1	41.1, 71.1
58	Nonanal	12.673	1104	1104.47	124-19-6	41.1	43.1, 57.1
59	Phenylethyl Alcohol	12.921	1116	1115.07	60-12-8	91.1	92.1, 65
60	N-Ethylsuccinimide	13.36		1133	2314-78-5	127	56, 84
61	Benzyl nitrile	13.56	1144	1141.49	2314-78-5	117	90, 116
62	4-Oxoisophorone	13.68	1144	1146.31	1125-21-9	68	96, 152
63	3-Methylheptyl acetate	13.75		1149	72218-58-7	43	70, 57
64	(2E,6E)-2,6-Nonadienal	13.92	1152	1155.83	17587-33-6	41	70, 69
65	trans-2-Nonenal	14.108	1162	1163.17	18829-56-6	43.1	41.1, 55
66	2-Methylundecane	14.21	1164	1167.12	7045-71-8	43.1	57, 71
67	trans-Pyranoid linalool oxide	14.353	1173	1172.6	39028-58-5	68	59, 94
68	Linalool oxide (pyranoid)	14.472	1178	1177.11	14049-11-7	68	59, 94
69	Naphthalene	14.76	1182	1187.9	91-20-3	128	127, 129
70	cis-3-Hexenyl butyrate	14.84	1187	1190.86	16491-36-4	67	82, 71, 43
71	Methyl salicylate	14.982	1192	1196.07	119-36-8	120	92.1, 152
72	Dodecane	15.098	1200	1200.36	112-40-3	57	43, 71
73	Decanal	15.23	1206	1206.33	112-31-2	43.1	41.1, 57.1
74	2,6-Dimethylundecane	15.4	1210	1213.94	17301-23-4	57	71, 43
75	β-Cyclocitral	15.577	1220	1221.77	432-25-7	137	152, 109, 123
76	2-Ethylhexyl acrylate	15.717	1220	1227.91	103-11-7	55.1	70.1, 41.1
77	Benzothiazole	15.78	1229	1230.65	95-16-9	135	108, 69, 91
78	cis-3-Hexenyl-α-methylbutyrate	15.8	1234	1231.52	14905-56-7	82	57, 67, 41
79	Geraniol	16.319	1255	1253.67	106-24-1	41.1	69.1, 93
80	Tridecane	17.46	1300	1300	629-50-5	57.1	43.1, 71
81	5-Methyltridecane	18.66	1348	1355.3	25117-31-1	43	57, 85
82	3-Methyltridecane	19.05	1371	1372.51	6418-41-3	43.1	41.1, 57.1
83	2-Ethyl-3-hydroxyhexyl 2-methylpropanoate	19.07	1373	1373.38	74367-31-0	89	71, 56
84	cis-3-Hexenyl hexanoate	19.23	1380	1380.33	31501-11-8	82	67, 43, 99
85	Hexyl hexanoate	19.35	1384	1385.51	6378-65-0	43	117, 99, 84
86	trans-2-Hexenyl caproate	19.41	1391	1388.08	53398-86-0	99	43, 55
87	1-Tetradecene	19.52	1392	1392.79	1120-36-1	41	43, 55,69
88	Ethyl decanoate	19.557	1396	1394.36	110-38-3	88	101, 73
89	Tetradecane	19.699	1400	1400.45	629-59-4	57	43, 71
90	Dodecanal	19.9	1409	1410.47	112-54-9	41	57.1, 82
91	Longifolene	20	1405	1415.41	475-20-7	41	161, 91
92	Caryophyllene	20.13	1419	1421.81	87-44-5	41	69, 93
93	α-Ionone	20.186	1426	1424.55	127-41-3	121	93, 43
94	Geranyl acetone	20.7	1453	1449.36	3796-70-1	43	69, 107
95	4-Methyltetradecane	20.92	1459	1459.79	25117-24-2	43	57, 71
96	2-Methyltetradecane	21.04	1463	1465.44	1560-95-8	57.1	43.1, 71
97	3-Methyltetradecane	21.18	1470	1471.98	18435-22-8	57	43.1, 71
98	trans-β-Ionone	21.383	1486	1481.39	79-77-6	177.2	43.1, 41.1
99	Pentadecane	21.801	1500	1500.5	629-62-9	43.1	57.1, 41.1
100	Dihydroactinidiolide	22.417	1532	1532.62	17092-92-1	111	137, 109
101	4-Ethyltetradecane	22.68	1548	1546.03	55045-14-2	43	57, 71, 85
102	4-Methylpentadecane	22.94	1556	1559.13	2801-87-8	43	71, 57
103	E-Nerolidol	23.022	1564	1563.24	40716-66-3	69	41, 93
104	3-Methylpentadecane	23.2	1570	1572.09	2882-96-4	57.1	43.1, 71
105	Hexadecane	23.781	1600	1600.61	544-76-3	43.1	57.1, 41.1
106	2,6,10-Trimethylpentadecane	24.668	1633	1648.72	3892-00-0	57.1	43.1, 41.1
107	2,2',5,5'-Tetramethyl-1,1'-biphenyl	25.22	1663	1677.79	3075-84-1	195	210, 180
108	Octadecane	25.662	1700	1700.69	593-45-3	57	43, 71
109	3-Methylheptadecane	26.94	1770	1772.74	6418-44-6	57	43, 71
110	Octadecane	27.45	1800	1800.61	593-45-3	57	43, 71
111	Isopropyl myristate	27.848	1827	1824.55	110-27-0	43	60, 102
112	Hexahydrofarnesyl acetone	28.155	1844	1842.79	502-69-2	43.1	41.1, 58.1
113	Methyl hexadecanoate	29.56	1926	1926.45	112-39-0	74	87, 43
